# Supplementary material
Source: PubMed Central journal article supplement (PMC4271531)
Supplement: supp_msu297_msu297_SI.pdf [file supp_msu297_msu297_SI.pdf]

**Table S1. Full and partial GvaELV insertions within *G. variegatus* genome**

| <b>Contig</b>               | <b>Insertion fragment</b>             |
|-----------------------------|---------------------------------------|
| G_variegatus-3.0.2-377.4    | 5'LTR-gag-pol-ORF1-tat-env-ORF2-3'LTR |
| G_variegatus-3.0.2-2016.3   | 5'LTR-gag-pol-ORF1-env-3'LTR          |
| G_variegatus- 3.0.2-5697.1  | 5'LTR-gag-pol-ORF1-env-ORF2-3'LTR     |
| G_variegatus-3.0.2-10092.17 | 5'LTR-gag-pol                         |
| G_variegatus-3.0.2-2153.2   | 5'LTR-gag-pol                         |
| G_variegatus-3.0.2-10866.4  | 5'LTR-gag-pol                         |
| G_variegatus-3.0.2-8117.15  | <i>gag-pol</i>                        |
| G_variegatus-3.0.2-152925.1 | <i>gag-pol</i>                        |
| G_variegatus-3.0.2-8117.16  | <i>gag</i>                            |
| G_variegatus-3.0.2-10866.7  | <i>pol-ORF1-tat-env</i>               |
| G_variegatus-3.0.2-8117.13  | <i>pol-ORF1</i>                       |
| G_variegatus-3.0.2-49750.1  | <i>pol-ORF1</i>                       |
| G_variegatus-3.0.2-10866.5  | <i>pol</i>                            |
| G_variegatus-3.0.2-10866.6  | <i>pol</i>                            |
| G_variegatus-3.0.2-146880.1 | <i>pol</i>                            |
| G_variegatus-3.0.2-17753.5  | <i>pol</i>                            |
| G_variegatus-3.0.2-8117.14  | <i>pol</i>                            |
| G_variegatus-3.0.2-10092.18 | <i>ORF1-tat-env</i>                   |
| G_variegatus-3.0.2-8117.12  | <i>ORF1-tat-env</i>                   |
| G_variegatus-3.0.2-8117.11  | <i>env-ORF2</i>                       |
| G_variegatus-3.0.2-49750.2  | <i>env-ORF2-3'LTR</i>                 |
| G_variegatus-3.0.2-3870.9   | <i>env-ORF2-3'LTR</i>                 |
| G_variegatus-3.0.2-10092.19 | <i>env-ORF2-3'LTR</i>                 |
| G_variegatus-3.0.2-77437.1  | <i>env-ORF2</i>                       |
| G_variegatus-3.0.2-104494.1 | <i>env-ORF2</i>                       |
| G_variegatus-3.0.2-132409.1 | <i>env</i>                            |
| G_variegatus-3.0.2-10866.8  | <i>env</i>                            |
| G_variegatus-3.0.2-132314.1 | <i>env</i>                            |

**Table S2. The contigs of *G. variegatus* genome that contains solo-LTRs**

---

|                             |                            |                             |                             |
|-----------------------------|----------------------------|-----------------------------|-----------------------------|
| G_variegatus-3.0.2-8479.2   | G_variegatus-3.0.2-7903.10 | G_variegatus-3.0.2-2410.7   | G_variegatus-3.0.2-10076.10 |
| G_variegatus-3.0.2-2048.1   | G_variegatus-3.0.2-2382.24 | G_variegatus-3.0.2-22810.4  | G_variegatus-3.0.2-154409.1 |
| G_variegatus-3.0.2-1170.10  | G_variegatus-3.0.2-9815.3  | G_variegatus-3.0.2-9850.2   | G_variegatus-3.0.2-8557.11  |
| G_variegatus-3.0.2-3930.9   | G_variegatus-3.0.2-1527.22 | G_variegatus-3.0.2-1543.12  | G_variegatus-3.0.2-851.14   |
| G_variegatus-3.0.2-12197.5  | G_variegatus-3.0.2-1410.62 | G_variegatus-3.0.2-269.14   | G_variegatus-3.0.2-2084.29  |
| G_variegatus-3.0.2-2846.1   | G_variegatus-3.0.2-92.27   | G_variegatus-3.0.2-55185.1  | G_variegatus-3.0.2-828.32   |
| G_variegatus-3.0.2-8406.15  | G_variegatus-3.0.2-1206.42 | G_variegatus-3.0.2-4052.5   | G_variegatus-3.0.2-44618.1  |
| G_variegatus-3.0.2-4589.3   | G_variegatus-3.0.2-5385.19 | G_variegatus-3.0.2-3530.18  | G_variegatus-3.0.2-5300.22  |
| G_variegatus-3.0.2-1584.17  | G_variegatus-3.0.2-2433.8  | G_variegatus-3.0.2-1646.44  | G_variegatus-3.0.2-1125.12  |
| G_variegatus-3.0.2-493.25   | G_variegatus-3.0.2-1280.15 | G_variegatus-3.0.2-960.14   | G_variegatus-3.0.2-204.33   |
| G_variegatus-3.0.2-112676.1 | G_variegatus-3.0.2-3400.33 | G_variegatus-3.0.2-749.10   | G_variegatus-3.0.2-1223.11  |
| G_variegatus-3.0.2-77.12    | G_variegatus-3.0.2-1207.29 | G_variegatus-3.0.2-644.8    | G_variegatus-3.0.2-1068.43  |
| G_variegatus-3.0.2-4172.5   | G_variegatus-3.0.2-663.4   | G_variegatus-3.0.2-295.43   | G_variegatus-3.0.2-128317.1 |
| G_variegatus-3.0.2-145895.1 | G_variegatus-3.0.2-11862.5 | G_variegatus-3.0.2-169378.1 | G_variegatus-3.0.2-1189.17  |
| G_variegatus-3.0.2-7305.2   | G_variegatus-3.0.2-11110.6 | G_variegatus-3.0.2-4237.2   | G_variegatus-3.0.2-9755.6   |
| G_variegatus-3.0.2-2848.6   | G_variegatus-3.0.2-5691.3  | G_variegatus-3.0.2-4540.15  | G_variegatus-3.0.2-1019.35  |
| G_variegatus-3.0.2-110.51   | G_variegatus-3.0.2-1019.36 | G_variegatus-3.0.2-2585.7   | G_variegatus-3.0.2-103.8    |
| G_variegatus-3.0.2-9564.8   | G_variegatus-3.0.2-6976.10 | G_variegatus-3.0.2-8664.13  | G_variegatus-3.0.2-985.11   |
| G_variegatus-3.0.2-778.18   | G_variegatus-3.0.2-762.20  | G_variegatus-3.0.2-1035.34  | G_variegatus-3.0.2-9489.7   |
| G_variegatus-3.0.2-2717.70  | G_variegatus-3.0.2-2360.10 | G_variegatus-3.0.2-4587.7   | G_variegatus-3.0.2-1838.3   |
| G_variegatus-3.0.2-2506.24  | G_variegatus-3.0.2-31940.1 | G_variegatus-3.0.2-2434.52  | G_variegatus-3.0.2-176.29   |
| G_variegatus-3.0.2-2257.8   | G_variegatus-3.0.2-2851.5  | G_variegatus-3.0.2-12462.12 | G_variegatus-3.0.2-34492.2  |
| G_variegatus-3.0.2-8914.13  | G_variegatus-3.0.2-1272.13 | G_variegatus-3.0.2-9761.9   | G_variegatus-3.0.2-2914.23  |
| G_variegatus-3.0.2-9564.7   | G_variegatus-3.0.2-9787.2  | G_variegatus-3.0.2-1899.3   | G_variegatus-3.0.2-5986.3   |
| G_variegatus-3.0.2-668.1    | G_variegatus-3.0.2-2783.23 | G_variegatus-3.0.2-1448.2   | G_variegatus-3.0.2-3980.18  |
| G_variegatus-3.0.2-7320.22  | G_variegatus-3.0.2-5377.4  | G_variegatus-3.0.2-12001.2  | G_variegatus-3.0.2-96066.1  |
| G_variegatus-3.0.2-6707.5   | G_variegatus-3.0.2-985.12  | G_variegatus-3.0.2-733.20   | G_variegatus-3.0.2-41646.1  |
| G_variegatus-3.0.2-1260.29  | G_variegatus-3.0.2-4076.14 | G_variegatus-3.0.2-15830.7  | G_variegatus-3.0.2-34583.1  |
| G_variegatus-3.0.2-2283.10  | G_variegatus-3.0.2-846.30  | G_variegatus-3.0.2-99674.1  | G_variegatus-3.0.2-3770.2   |
| G_variegatus-3.0.2-6765.16  | G_variegatus-3.0.2-728.9   | G_variegatus-3.0.2-8284.2   | G_variegatus-3.0.2-90522.1  |
| G_variegatus-3.0.2-5771.10  | G_variegatus-3.0.2-1130.20 | G_variegatus-3.0.2-11676.11 | G_variegatus-3.0.2-2585.6   |
| G_variegatus-3.0.2-11917.7  | G_variegatus-3.0.2-6208.4  | G_variegatus-3.0.2-1570.8   | G_variegatus-3.0.2-3980.17  |
| G_variegatus-3.0.2-14988.4  | G_variegatus-3.0.2-93.30   | G_variegatus-3.0.2-509.7    | G_variegatus-3.0.2-11464.20 |
| G_variegatus-3.0.2-3285.7   | G_variegatus-3.0.2-9418.9  | G_variegatus-3.0.2-186.46   | G_variegatus-3.0.2-5606.17  |
| G_variegatus-3.0.2-2506.28  | G_variegatus-3.0.2-7812.1  | G_variegatus-3.0.2-45573.1  | G_variegatus-3.0.2-93.31    |
| G_variegatus-3.0.2-6246.24  | G_variegatus-3.0.2-6820.1  | G_variegatus-3.0.2-5978.7   | G_variegatus-3.0.2-12462.13 |
| G_variegatus-3.0.2-4124.7   | G_variegatus-3.0.2-1721.22 | G_variegatus-3.0.2-808.25   | G_variegatus-3.0.2-41149.2  |
| G_variegatus-3.0.2-1032.24  | G_variegatus-3.0.2-2986.3  | G_variegatus-3.0.2-3938.16  | G_variegatus-3.0.2-757.27   |
| G_variegatus-3.0.2-3741.2   | G_variegatus-3.0.2-3330.11 | G_variegatus-3.0.2-8517.13  |                             |

---

**Table S3. The retrovirus sequences used in this study**

| <b>Virus</b>              | <b>Full name</b>                                    | <b>Accession No.</b> |
|---------------------------|-----------------------------------------------------|----------------------|
| OLV                       | Ovine lentivirus                                    | NC_001511            |
| MVV                       | Maedi-visna virus                                   | NC_001452            |
| CAEV                      | Caprine arthritis-encephalitis virus                | NC_001463            |
| BIV                       | Bovine immunodeficiency virus                       | NC_001413            |
| HIV-1                     | Human immunodeficiency virus 1                      | NC_001802            |
| HIV-2                     | Human immunodeficiency virus 2                      | NC_001722            |
| EIAV-USA                  | Equine infectious anemia virus                      | NC_001450            |
| EIAV-Ireland              | Equine infectious anemia virus                      | JX480631             |
| EIAV-Liaoning             | Equine infectious anemia virus                      | AF327877             |
| FIVcat                    | Feline immunodeficiency virus                       | NC_001482            |
| FIVsubC                   | Feline immunodeficiency virus                       | AF474246             |
| FIVoma                    | Feline immunodeficiency virus                       | U56928               |
| FIVpuma                   | Feline immunodeficiency virus                       | EF455614             |
| FIV-PPR                   | Feline immunodeficiency virus                       | M36968               |
| FIV-lion                  | Feline immunodeficiency virus                       | EU117992             |
| JDV                       | Jembrana disease virus                              | U21603               |
| SIVagm                    | Simian immunodeficiency virus                       | NC_001549            |
| SIVmnd2                   | Simian immunodeficiency virus                       | NC_004455            |
| SIVhoest                  | Simian immunodeficiency virus                       | AF188116             |
| SIVsyk                    | Simian immunodeficiency virus                       | L06042               |
| SIVcol                    | Simian immunodeficiency virus                       | AF301156             |
| SIVtal                    | Simian immunodeficiency virus                       | AY655744             |
| SIVgsn                    | Simian immunodeficiency virus                       | AF468659             |
| SIVrcm                    | Simian immunodeficiency virus                       | HM803689             |
| SIVsmm                    | Simian immunodeficiency virus                       | M80194               |
| SIVepz                    | Simian immunodeficiency virus                       | AF115393             |
| SRLV                      | Small ruminant lentivirus                           | HM210570             |
| MELV                      | <i>Mustelidae</i> endogenous lentivirus             | Ref. 1               |
| RELIK- <i>Oryctolagus</i> | Rabbit endogenous lentivirus K                      | Ref. 2               |
| RELIK- <i>Lepus</i>       | Rabbit endogenous lentivirus K                      | Ref. 3               |
| PSIVgml                   | Prosimian immunodeficiency virus                    | Ref. 4               |
| GvaELV                    | <i>Galeopterus variegatus</i> endogenous lentivirus | This study           |
| PSIVfdl                   | Prosimian immunodeficiency virus                    | Ref. 5               |
| ALV                       | Avian leukemia virus                                | NC_015116            |
| RSV                       | Rous sarcoma virus                                  | NC_001407            |
| LDV                       | Lymphoproliferative disease virus                   | KC802224             |
| JSRV                      | Jaagsiekte sheep retrovirus                         | NC_001494            |
| SRV-1                     | Simian retrovirus 1                                 | M11841               |
| Python-molurus            | <i>Python molurus</i> endogenous retrovirus         | AF500296             |

---

|        |                               |           |
|--------|-------------------------------|-----------|
| HERV-K | Human endogenous retrovirus K | AF164614  |
| MMTV   | Mouse mammary tumor virus     | NC_001503 |

---

## References

1. Han GZ, Worobey M. (2012). Endogenous lentiviral elements in the weasel family (Mustelidae). *Mol Biol Evol.* 29, 2905-2908.
2. Katzourakis A, Tristem M, Pybus OG, Gifford RJ. (2007). Discovery and analysis of the first endogenous lentivirus. *Proc Natl Acad Sci U S A.* 104, 6261-6265.
3. Keckesova Z, Ylinen LM, Towers GJ, Gifford RJ, Katzourakis A. (2009). Identification of a RELIK orthologue in the European hare (*Lepus europaeus*) reveals a minimum age of 12 million years for the lagomorph lentiviruses. *Virology.* 384, 7-11.
4. Gifford RJ, Katzourakis A, Tristem M, Pybus OG, Winters M, Shafer RW. (2008). A transitional endogenous lentivirus from the genome of a basal primate and implications for lentivirus evolution. *Proc Natl Acad Sci U S A.* 105, 20362-20367.
5. Gilbert C, Maxfield DG, Goodman SM, Feschotte C. (2009). Parallel germline infiltration of a lentivirus in two Malagasy lemurs. *PLoS Genet.* 5, e1000425.

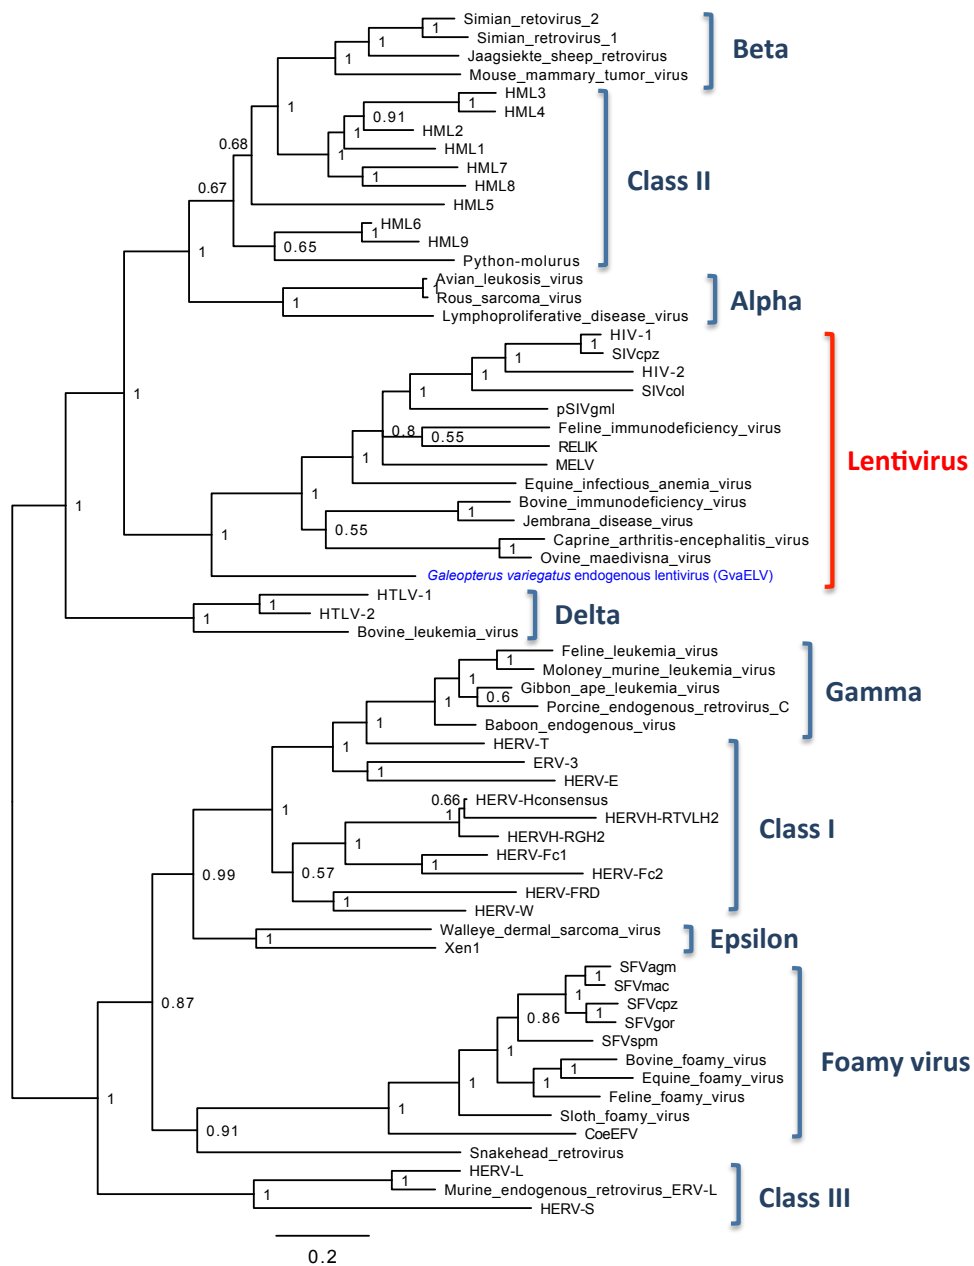

**Fig S1. Retrovirus phylogeny.** The phylogeny is 50% majority-rule consensus tree inferred using a Bayesian approach available in MrBayes. The node labels are posterior probabilities. The lentivirus reported in this study, GvaELV, is highlighted in blue.

**Fig S2. The reconstructed GvaELV genome sequence**

5' LTR->  
TGGAGGAAAAATGAAGGAGAACACCTGTAAAGATGGAGGCACTCTTGCTCTCCAGGATTTAGACTGTGACGAGAAATGCAAAAA  
GACTGGGTGACGAAAAATTCGCAAAGCTTAACCGCAAACCACAGACTTCTTATTGAGTTACCTAGGAGATGGGGAGGTATGGGA  
GGGTTTACAGCTGGCTAAAACATATAAAGACATGCTTTTACCCAATAAAGTTGCTTAGTGCGTGAAGCCCAAGAACTT  
TGTGCTGTTTCTGGTTGACCACCTCCCCAGGTGGCAGCCCCTAGCTCAAGGCGTCTCTGAGCAACTCACCTTGTGCACTC  
TCTTGGCAGGGCTGTGTGTGGCCCTGCTCCCTGAGGGACTCCTGGCAGAGGCTACATGTAGTCTGCTCCTGAGACCCCCAGG  
<- 5'LTR  
ACCAAGAGAAAAGGTGCAGACTTGGCGCCCAATGTGGGGCTTGAAGGCTGACCCAAGGACCGGACGGAGGTCTGCAGGACAGTGG  
gag ->  
AGAAGGTGAGTCTGTGCGGCTAGGTCCGGGTAGGAGTAGCTTATAAGCAGGATGGGGACTGTGACGTCAGCAAGGCTTGTACT  
TCAGTCATACAAGGCATTAAGCATTGCCAATCAGTAGAGAACTGAAGGGAACAGGGAAGACAACACACTGGGCACCTGAGGAT  
S V I Q G I K H C Q S V E K L K G T G K T T H W A P E D  
ATTTATAGGCATTTTCGCGAGGCACATGTTTATTGCCCAACGTTTCTGAAACTGGGACACTAGATGTCAGGGGACTTAGGGAA  
I Y R A F R Q A H V Y C P T F P E T G T L D V R G L R E  
GGGATAAGTGCCCTTCAGAAAGCAAGAAAAGAGCACCCAGAGTTGTCTGTAGCTGTGCAAGCCCTGCAGGTATTTCTGTGTAGG  
G I S A L Q K A R K E H P E L S V A V Q A L Q V F L C R  
GGAATGTTGGGAGTGGCGGTAAGGACCCTGAGGAAGTAGAAAAGGTATATTTTCGAGTTTCGAGATGCTGGCCAGATCTCAGAC  
G M L G V A V R T T E E V E K V Y F E F R D A G Q I S D  
TCAAGAAATATAACAAGGAGAAGGTAAGCAGGTGTACCAGTAGTCCAAGGTCCAGGAGGAACATATGTTTCTCCTCTGCACCCCT  
S R N I Q G E G K Q V Y P V V Q G P G G T M C S P L H P  
TGAGTTATGGCAGATTTCTTTGACATCATTAGTCATCATGGATTACTGAGCTCAGAAACTATCACTCGAATGCAAGTTTATGT  
\* V M A D F F D I I S H H G L L S S E T I T R M Q V L C  
ATGCAGGATTTATGCCAGGTAGAAGTAAAAGGCTTGTATTGCTCAAGCACCTGGGAATGCTGCACAAAAATCAATTCATAAAGAA  
M Q D L C Q V E V K G L I A Q A P G N A A Q K S I L K E  
TTGTTAGCAAAATATAAAGATGAATGGGATCAACAAAACCCATACAGCAAGATGTTTTTCCAAGACAATTGACAGGGGACAAA  
L L A K Y K D E W D Q Q N P I Q Q D V F P R Q L T G D K  
ATAGTAGGAGAATCCCCAAACAATAATTTACCAGATGCACAGCAGGACCCCAATGGGTAATAGCTAGATCAACCTTCCAGGAG  
I V G E S P N N N L P D A Q A G P Q W V I A R S T F Q E  
TGGGTTGTCAATGCACCTAGGGAAGGAGTTAAATTAGTTTCAGAAACCCTGCAGTAACAAAAATGTACAAGGTCCTAGAGAG  
W V V N A L R E G V K L V Q K P P A V T K I V Q G P R E  
CCATATAAGGATTTTTGGATAGGCTATTTGAAGCATTGGAAAAGGATTTTTTACCTTTAGAAGTTAGTAGATACTTACAGGAT  
P Y K D F L D R L F E A L E K D F L P L E V S R Y L Q D  
AAATTTGGCTTTTGAAAAATGCAAAATGAAGATTGTA AAAAGATGATGGCTCACTTGCCTCCGGATGCAGCAATTGCTGACAGGATA  
K L A F E N A N E D C K K M M A H L P P D A A I A D R I  
CATTGCTGCAGATCCGTGGGTACAGTGACCACAAAACCAACCATGATGGCAGAGGCTTTTGCAGCAGCTCTCTTTAAAGGAAAA  
H C C R S V G T V T H K Q T M M A E A F A A A L F K G K  
GGGAACCAGCAAGGGCTTAGATGTTTTAATTGCAATAAACTAGGCCATATGAAAAAGATTGTAAGCAGCAAGAAAAGGCTACA  
G N Q Q G L R C F N C N K L G H M K K D C K Q Q R K A T  
pol ->  
GCTAATAAAGATGTTACATGTTTCAAATGTGAAAAAAGGGACACATTGCCAGGTTATGCAGAACAAAAACGGGAAAGCAGGC  
A N K D V T C F K C G K K G H I A R L C R T K N G K A G  
TCAGGACAGGGAGCCAGGCATTGGTATCACAGCCTGTTCTGCCATCAGCACCGAGTGGAGGAAGAGACAACCAAGTCACTTTAC  
S G Q G A Q A L V S Q P V L P S A P V E E E T T K S L Y  
<- gag  
CCCAAATTACCAGTTTGAACAACAAGACCAATAACATTGATACAGTGTGCAGGGACAGAGGTTAAGGTTTTATTAGATACAGGAG  
P K L P V C N K D Q \*  
CAGATATTTCAATTTGGGCAAAACCACCCCAATAGGAAGAAATATAGGCCAGCAATTTGTAATGGGAATAGGGGGAAGTCAA  
CAGGAATTAATATGATCAAGVTTAAAATGACATGGAATAATAAAAACATTTTAGGTGAAGTAGTAGTGTGTCCCACGCTATAA  
ATTTATTAGGGAGAGATAATTTAAGCAAATTTGGAGTACACTTGGTGTGTACAACGTTAAATCAACAGTTAACACCAGTGAAT  
TTAAATTGTTACCAGGATTTAGAGGACCACAGGTTAAGCAATGGCCATTATCTGAAGAAAAAATTAAGCATTACAAGAAATTT  
GTGCTGAATTAGAACAGGAAAAAAGATACAAGAGTAGGTCAGAAAATCCTTATAATACACCTGTATTTTAATAAAAAAGA  
AATCTGGTAAGTGGAGGATGCTTATGGATTTTAGGGAATTAACAAAAGGAATAGATGTAGGAACAGAAACTCAGTTAGGTATTC  
CTCATCCAGCAGGTTTTTACAGGTAAGCACTTTACTGTTATAGATATAAAAAGATGCTTATTTACCATCCATTAGATGAAG

AAATAAGTGAAGTTAACAGCATTTCAGTACCTCAAAGAATAATGCAGGGCCAGGTATAAGATTTAAATGGAAAGTTTACCAC  
AAGGGTTGATAGGGTCTCCAAAAGGTATCAATGKACTTTAGAAAAAATAAACACCATGGAAAGCAAACACCCCTGGCATAA  
CATGTTATGTATATATGGATGATATTTAATAGGAACAAATTATACAGCTCTCAAACATAACAAGTAGTCAAAGAGTTACAAG  
AGGAATTTAAAAGTGGGGATTTGAAACCCACAAGATAAAATACAGAATAGTGATGGGGACAAAGCAGTAAAATATTTAGGAT  
ATATTTTAGAACCCAAAACGTGGAAGCCACATAGCTATCAGCTATTGGATAGTAAACAAAAACATTAATGATGTTCAACGAG  
TATTAGGAAGAAATTAATGGATAAAAACAAATATATCCTAAGATACAAACAGAAAACATTCAGAAGTTATTAACAGGAGATCAA  
ACATATTAAGTAAAAGATCATGGACTAAAAAGCTCAATATGAGGTAGATGTAATACAACAAATGTTAACACAGCAGGAGGAA  
TGCCTTATTATCAAGAAAAGGAAGTCTAGTCTTAGTATTGTATGGAATCAAGTAGCTCAAGGAGCTGTTTATCAAAGCATA  
AGGTGCTCTGGTGGGGACGGAAGTACGAAAGGACAGAAAAATAAAAACCAAGCAGAAAAATGTGTGGCTTTAGCAAAATCGTA  
TGGTTTCAGAAATAATCATACGATTGGGAAAAGTTCCAGATGAAGTTTGGTTGCCCATAGAAAAAGCTACTTTTGTAGATTTAT  
TACAAGAAGGATTAGAGGGAACAGAAATTTGGTTATTAATTTGCAAATTTGGTATGGCACCTAACAAAATTTTGTATAAAGTG  
AATGTTTAAAGTTATCCTTGTATATGGAAAAGTCTGTCTTCCGTGACAGGCCCTACAATTTATATAGATGGACTCTAGAAAAGG  
GACAGCCAGCTCGTAGTGCTATATGGGAGAATGCAATAATAATAAAGTAACAGAATTTGAGGGAACAGCTCAGCAAGCAGAAG  
TTAGGGCATTTTTATTAGCATTACAATTAGAATAATAATAAATGAACATAGTTACAGACAGTAAATATTTATGGACATGTATTA  
AGTTAATGTCTGACTATGCATGGAAAGAGGAAAATCCAATTTGGCAAGAAATCTGGAATTTATACAAACAAAGAAAATATATT  
TACAATGGGTGCCAGGACATCAAGGGGTGCCAGGGAATGAAGAAGCTGACAGTTTAGCCAGGGAATGTAGTCTTACTGCAG  
AAGAGGAGGACTTACTGCCACAGCAGTCAAGACTTTGTTTCCCTGGGCAAATAAAAGCAGCCAGAGATGTTTATGTGCAG  
CCCAGGAAAAAAGACAAATATTTACAGGAATACACCTCCAGTTGGATGAAATGCAATAGCACAGATGCAATTAATTTATGAAT  
TAGCTATAAAAGGATTGTTATTATACAGTCAACTGTTAAAGGAAGTTATTCAACAGAATTAATATTACAAGTTGTAATTTTAA  
CTAAAAAGGGAATAAATATTCAAAGGGTATCCAGTCTGTTATTTATATATTATAGCTGCTGAAGAGATGGGGGAAACAAAGT  
TACAAAAGTCACTCCAGATGACATGGTCTGTTTCACCTCAGAACTTTTCAGGAAGCAGAACAGTGGCATGATGTAACACATG  
CAAACCCCGACAATTAGCAAGAAAGTTTCATCTTCCCTTAGGATTAGCAAAAGCATATTACACAGTTATGCAAAAGACTGCCAAC  
AGCAGGATACGGCTACAGGAGAGGGATATAATCAGTTAAAAAACCAGAAGGTGTTTGGCAGATGGATGTTACACACATGTTTG  
AGTTAGGACTTTATAAATATGTGTATGTAGCAGTTGACATACAAACAGGAATGATATGGGTTAGTCCACAAAAGGGAGAAAACAG  
CAAAACATACAAAACAGCTCTGCTTCCAGTCAATTCATATGGCAGGCTCCCAAAGGAAATCCAAAGTGATAATGGACCAGGTT  
TTGTAGCAGATAGAGTACAAGTGTGTGTAACAATTAGGGATTAATGGCATCATGGCATTCCATACCATCCTCAGAGTCAGG  
GAAAAGTAGAAGGTACACATAAATTAATAACAACACTTCAAAGAGTAAAAGAGTTATTTGAAGACCCCATTAATGCTCTGT  
TGTGGACAGTATTTTGCCTCAATTTGAAAAAAGGGTGGAGATGGGTATACAAGAGCAGAGGCATGGGTGGAGCAACAGAATT  
TAAAAAATCAGTTAGAAACATGTAAGCATATGCAACTTTAACTAATTCCTGTAATTTTGTATAAGGATCCCAAGTCACCTC  
GAACAGGGTGGAGAGGCCAGGCACTCTGCAGTGGGAGGAGCAGGCGTCAGAGTATTAGAACTTACAACCTGGAGAGGTTAAAAG  
TGWRRSFGTLOWEGAGVVRVLELTTTGEVVKV

<- pol

hypothetical ORF1 ->

TAGTTCCTAAACATCTAACAAAAGAATTTTTTTCAGATGGAGCCTAGAGTTCAGATGAATCCTGAAGTTACTGTTTCACTGGATG  
VEKHLTKRIFSDGA

M E P R V Q M N P E V T V Q W M

GATGCCTTTTGTTTTGGACAAGAAGAAGCCATTATTATAGCTTACATCATTAAATGGCCAAGAGTTACACCCTGGTGAACCTTATG

D A F C F G Q E E A I I I A Y I I N G Q E L H P G E L M  
GTAGTGCATAAGCAAACCTATTCCTAGATGGTTAACACAGGTTACTCGTTCTATGTGGAATAAACATAGAAAAAGTACAGAACAG  
V V H K Q T I P R W L T Q V T R S M W N K H R K S T E Q  
AGATTAATCCAAATACAAAAAGATATTGGATCAATACCTTTTTGTGGACCTAAAAGATATGTCTTAGTGAAGGATGGGAACAA  
R L I Q I Q K R Y W I N T F C G P K R Y V L V K G W E Q  
AAGTAAAATGGGTCAAACACATACAGTTGTTGCCAAAGTTTGGGAACATATGTATGTGGTGCCTGGTGTAAAGTTCCCAT  
K V K W V K H I Q L L P K F G N I C M W C P G V K V P H  
TGGAGTGAACCATATGGTGTCCAAAGCCTCGTGGATCTTATTTAGTGCAGTTAAGACAATTAATAAATCATATGGTAGAAGAA  
W S E P Y G A P K P R G S Y L A V Q Q L R Q L I N H M V E E  
ACTCATCTAGCCCCAGAGGAACCTGTGGATGGCCTTACAGATGCCACCATGTGTTCTTCAAGCAGCTATTATATTACTAGAA  
T H P S P R G T C G W P Y R C P P C V L Q A A I I L L E  
GAGGATTATTGGAAGATGAGGAAGTTATTCCAAAGTTACAAATGATATGTATAGTAGATGTTAAAACAACCTGTGGAAGAA  
E D Y W K D E E V I P K L Q M I C Y S R C L K Q L W K E  
ATGACTTATCAAATTTCAAAGAACATTAGTACATGGCATAGGATGCAAAACACCAGTAAGTACAAAATGGCAATCACCA  
M T Y Q I S K R N I S T W H A R M Q T P V S T K W Q S P  
AAACATGGCCCTCATGTACATTACAGGAATCCCTTGGCAAAGACTAGCAACAAAATTTGTGTTGGGAGTCTAACGGGGATTTA  
K H G P H V I T G I P W Q R L A T K F C V W E S N G D L

<- hypothetical ORF1

tat ->

AGATCAGAAGCATAAAGAGTAACCTGTGGTAAATGTGTTGTGAATGTAGATGCCTTTGCTTGCACTGCTATTATCATTGCATTT  
R S E A \*

M C C E C R C L C L H C Y Y H C I I

TATGCTTTTCAGCAAAAATACTTAGGGATAACACATGAAGGAGGTCCCAGAGGAATAAAACCTTGTGTGCATAAATGTTATAATC  
C F Q Q K Y L G I T H E G G P R G I K P C C H K C Y N F  
CAAAACAGGGAGGTAAATACTGTGGGACAAAAACAGTTTGAAGTACATTCACAACCTTGTTTTCATAAATGTTGTAGATGAC  
K Q G G K Y C G T K N S F E V H S Q P C F H K C C R \*

CTATTTCAAGTGAAGAAAGAAAGTACAATACTGTGTTCCAAAACGAGGAGCAAACTCTGTTGGGACAAGCAAACTTATAT  
TAGATTAAGAATACAGATCCCAAGAACACTTAGTGAAGGAAGGAAAATAATCCTCAGCTGCTACCCCTGTTGTGCAAAAAGGA

env ->

ATTGTGAGCAACAGAGTTAGATCCAGTCCCTGAAGAAACCATGGCCTCTTCTCCTTACCATTAATAAATAATGAGGAAGATGA

M A S S S L P L I N N E E D D

TTTTTATATGGTAATGACTCCTAGACTGTTAACAAAAGAACTCAAACCTGACCAAAATAAATAAGATGACCCAAAAGGCGAGCC  
F Y M V M T P R L L T K G T Q T D Q I K M R S Q K A G P  
ATCCAAGGAGGATAAAAATAATGGAAGAATTAAGGGTCTTACAGTTCAACAGGAGAAAAGGAGAGATGGAGACAACAAGAGCT  
S K E D K I M E E L R V L Q L Q Q E K E E R W R Q Q E L  
GTGTAACACCAGCTCATCTGGAGAGGACAAGGACGTGAGTGTGCCTTTGTTACCGGCAGGAAAAGGTAATAAATATTATGGGT  
C N T S S S G E D K D V S V P L L P A G K G K N I I W V  
CTGTATTTTACACATTTGGGTCCCAACATGTCAGAGTGTGTTAGGTTAGGTTGTTAAAATGGTCCAGTGCATCTACACTTGT  
C I L A H L W V P T C Q G F R L G L L K W S S A S T L V  
AAGTCTCAAAAATCCCTTGGTGTGTCAGCAGCAATACCAATTAGGATGCTTCCCAAAAACCATACATAACACAGCT  
S P Q K I P W F C A A A N T Q L G C L P K N H Y I T Q L  
GCATTTGGGAGGAAAACATCCCATATGTGGGACTTAGAGGACACAGAAAATGGTACAGAATATGGAACAACAATTTGGGGCT  
H W A G N N T H M W G L R G H R N G T E Y G N N N W G L  
GCAAAATAGGAAAACAATGGGTATGGATTTTGAATAATTTAAATGCTCAATGTCCAAAATAATGGCTTATTATAAGCCATT  
Q I G K Q W V W I F E K Y L N A Q C P K N M A Y Y K P F  
TAATGTACAATGCCACCTGGCCTTTAAATGTAAGTGGGATTTGGGAAGCAAACTGTAGTGGACTGGAATGGATTTTCA  
N C T N A T W P L N V T E D Y W E A N C S G L E W I S D  
TTCCACTGGCAGAACTTCAAGGACATAAGCCTATGATCTTTAATACCACTTGGGCATTAAGCAAGGACTTGTAAATCAAAT  
S T G R I L Q G H K P M I F N T T W A L K Q G L V N Q I  
CAGTTGTAACCAAATCATACTGCTCAAGGTCTCAGTGAAGAAAAGCAATAAAGCTTGGTGTGTAATGGAAAGACTGCAA  
S C K P N H T A Q G S Q C K K S N K A W C C N W K D C N  
TCAATTTCAAGATATTTAGAAGCATGCCCTGAAAAGCTCAGTTGCTCACTTCTTTTACCAAGGAGTACAGTTATGTGTCCA  
Q F Q D I L E A C P E K L R L L T S F T K G V Q L C V H  
TAGACCTTATTATTTTGGAGTTGTAACAACACAAAATCAAAGAGAGTATGACACAAAACAGTAATGTTAGTGGTGAATTTAA  
R P Y Y F W S C N K H K I Q R E Y D T N S N V S G E F K  
ATGGGGGAATGAAACAATTTGGGACAGTAGTACCAACAGACAAAATGAAACTTTACAGCTAGTAAAATGGGAATGTGACGGAGA  
W G N E T I V G S S T N R Q N E T L Q L V K W E C D G E  
AGCTCAAGTCACTCAGTGTACCCGAGTTAGGTGAAGTCAACTTACAAGTATAGTACATTTATAGGAATAGGATGGAAGAAAGGAT  
A Q V T Q C L P E L G E L T T D S T F I G I G W K N W I  
ATATCTCAATTTGGTCTGGCAGGCAAATTTGTAATTTGACAATAATAATACATGGAGAATCCAACAAGTGAACAACAATGA  
Y P Q L V W Q A K F V N L T N N N T W R I P T S E T N D  
CCAAAGCATCAAACAGTCACTGGCTACATAGTATAAAAATTAACGAACTCATCCAGGACAAGTAAATGTACTATTAT  
Q S I K T E Q S W L H S I K F N E T H P G Q V N C T I M  
GCATTTATCTAGTTATGCTAATAAGAAGCAATACATGCCTTTTAAATAGCTTAGCATTTTGCAATTTATCCTTGGCAGGGCAAGT  
H L S S Y A N K K Q Y M P F N S L A F C N L S L P G Q V



CATGAAAAGGTGTTTATCAAACATTAGTAATTTGCCAGAGGAAGGGAAATTTGATTGTGCTATCCACATCCTTGGGTAGCAGG  
M K R C L S N I S N L P E E G K F D C A I P H P W V A G  
GGATTTCCAAAGATGGACTTGGCAATACACAAAAGGCAAGGGGATGATGAGCCATCAACACCACATTTGTCTTTCCATGTGA  
D F Q R W T W Q Y T K R Q G D D E P S T P H L S F P C E  
GATGAAAGACAAAACAATTATTTCAATTAGAGTGCAATTTTGTAATAAAACTAAAAATGCAAAATGATACTCAATTTTGTCAAGA  
M K D K Q L F Q L E C N F V N K T K N A N D T Q F C Q D  
TTGTTTAGAATGTAGATCCAGGGATACTAGGATCTTACTATGGACTCACAAATTAATGCATGTACGGTCAACAGGGGAATACAA  
C L E C R S R D T R I L L W T H K L M H V R S S G E Y K  
ATATACAACATGTAGTTTCCAATTTATAGGAATTCATGTGACTCATTAAGAGTTAAAGGCCAGGAAGGCACACAATGGAAAAA  
Y T T C S F Q F I G I H C D S L R V K G Q E G T Q W K K  
ATTTGACATAGAAAAGTAGTCAGTGTGACATGTTGTTCAATGTATCAGCACCAGAGGGAGCAGCTGGCACACCAAACAGTACATG  
F D I E S S Q C D M L F N V S A P E G A A G T P N S T C  
TGCTCGTTCACGGTACGCCATTTGTTTTGCAACTACAGGAGGCCAGAGGAATGGATTCAACAGGCTTTTGTACAGACATATTA  
A R S R S A I C F A T T G G P E E W I Q Q A F D R H I K  
GGTGGGCTGCAGGAAAAATATAATTCCCATTCCTATAGATGATAACAAGTTAGAAAATGTTAAGCCAAAGAGATCCAGCGTGG  
V G \* Q E N I I P I P I D D N K L E I V K P K R S K R G  
AGCTGTTTTATGGCTGCTTTCCGAATTTACTGCCATCACTGCTGCGGCTGGTATGGCTACAGGTGGGGTGGCCCTCCATCA  
A V L L A A F G I V T A I T A A A G M A T G G V A L H Q  
ATTACAGGAACCTAAGGAATAGTAGCAGCAAAAATGTCAGGTGATGGTGGATCTGATAAAGACCAGGAAATCATTGGGTTTT  
L Q E L K E L A D K N V Q V M V D L I K T Q E N H W V F  
TACGAGGATCTTACATTTGGACTTTTGGAGCTAGAAGCTCGAGTACGCTGGATTGAGGAGGTGCTGGCCACTGACAAAGCCTT  
T R D L T F G L L E L E A R V R W I E E V L A T D K A F  
TCAAACATTAACCTGTGAAAATATCAGCCGGCAGTCTTTGCATTTTCCGAGAGTGGTACAATACAACACAGCTCAAAGAATGGAT  
Q T L N C E I S A G S L C I F R E W Y N T T Q L K E W I  
CAATAGCACCACTGGTACAACATGTCAATTAATGAGTGGGCAGCAAGATTACAGTTTTTTCAAAGGGCATAAAAAGAAATAGA  
N S T S W Y N M S I N E W A A R L Q F F Q K G I K E I D  
CAAATTAGTCTTAAAAATAGAGTAGGAAAAAAGAATAGAGTAGGTTTAAACACACTAAGACATAGTTTACAGAAGGTACAAGA  
K L V L K N R V G K K N R V G L L T H L R H S L Q K V Q E  
GCATCAACATAGAGCATGGATTAGTACAGTGCCTGATGGTTGTCTTCCATATGGAGGGCATTAAAAAAGAGTTGGTGGT  
Q S T L E A W I S T V P D W L S S I W R A L K K S W W W  
GCTCATCATCGGCATAATTTGTTTGGTTCATCATTATCCCTTGTACCTAGTTGTATTAAAGCAATTATAAATTATATCAGAGG  
L I I G I I C L V I I I P L L P S C I K A I I N Y I R G

Hypothetical ORF2 ->

<- env

ATATGTAATATTAATATGTTTGTATATACAGGAGCAATGACCACGAGAGAGATGATGGACAACAAGATAAAAAGACACAAGAAA  
Y V I L N M F D I Q E Q \*

M T T R E M M D N K I K R H K K

AGAAAACCTCAAACAAAAGGAAAAACAAGAGCAGCAACACTTGGCCAAACACCATCCCCTTCGCTTTTAGGCTTAAAAGCCGCT  
R K L K Q K E K Q R A A T L A Q T P S P S L L G L K A A

<- Hypothetical ORF2

GCTGCAGCACTTGGATATCATCTTATTCCGGCAATAGAAAAAGAGATTTGAACCAAAATCATGCTATTGTTGCTGTTACTGTTG  
A A A L G Y H L I P A I E K E I \*

AGGCTGCATATTAATCAGATGGCTTTTTGTGTGTGTATTTAGACTTTGCCAACATTTGCAAGCCTGCTTTTAAAAGAAAAAGG  
-> 3' LTR

GTGGACTGGAGGAAAATGAAGGAGAACACCTGTTAAAGATGGAGGCACTCTGCTCTCCAGGATTTAGACTGTGTACAGCAGAAA  
TGCAAAAAGACTGGGTACAGCAAGAAATTTGCAAGGCTTAACCACAAAACCACAGACTTCTATTGAGTTACCTAGGAGATGGGGAG  
GTATGGGAGGGTTTTACAGCTGGCTAAAACATATATAATACATGCTGTAGGCAATAAAGTTGCTTAGTGCATGTACTAAGTCC  
CAGAACCTTTGTGTCTGGTTTCTGGTTGCCACCTCCCTAGGCGGCAGCCCCCTAGCTCAAGGCATGCCCTGAGCAACTCACCTCG  
CTGCACTCTCTGGCAGGGCTGCGTGGCCCTGCTCCCTGGGGACTCCTGGCAGAGGCTATGTGTAGTCTGCTCCTCTGAGA

<- 3' LTR

CCCCAGGACCAAGAGAAAACGTGCA

```

CAEV_vif      MqnsRrhQqkRN-----KkpGPElFlalWihIAeSIN-gDssW-Y
SRLV_vif      MqnsfRrQqrrRN-----KepGPNlFlplWKhIAeSISig-rDssW-Y
OLV_vif      MLssyRnQkkyKqnKi-----RevGPQLFlwaWKEIAfSIN-qEpYW-Y
MNV_vif      MLssyRrhQkkyKknKa-----ReiGPQLFlwaWKEtAfSIN-qEpYW-Y
HIV-2_vif    MeeDrnwivvp-----twrvP-grmekWhaL---Vk-ylkYrtk
HIV-1_vif    --MENRwQvmi-----vwqvdrmrirtWKSIL---Vk-hhmYvsg
BIV_vif      --MERtlQsvvg-----RrrGssnrgrgknsL---IS-tpsYaLH
JDV_vif      --MERtiQspmg-----RrrGssgrrkrnani---IS-ppaYaIY
FIVsubC_vif  -MsEedwQvskRlfavlQggvhsamlyiselpemekeQykkefkKrl---ld-kEtfGfIr
FIVpuma_vif  -MqpyRvQsskRNmRyfk-----enncsEdqikqfKnk---lglqElrWIR

CAEV_vif      iTmRLQqmmWgKrgNKLqyknEDREYENWEiTswgWkmhLRRvkqwIqdnrrgsP-W--Q
SRLV_vif      iTvRLQqmmWNKrgNKLqyrnEDKEYENWEiTswEWkmhLRRvkhrIqengrgNP-W--Q
OLV_vif      sTiRLQGLmWNKrgHKLIFvKEEngYEWETnkQWRmeLRRdlrLIaqinfrNa-W--Q
MNV_vif      sTiRLQGLmWNKrgHKLmFvKENQgYEWETsgkQWkmeIRRdldLIaqinfrNa-W--Q
HIV-2_vif    dleeVryvphHKvgw-----awwt--csrvifpLggkshLeiqaY-----W--n
HIV-1_vif    kargwfyrhhyEspH-----pris---sEvhipL-gdarLVitty-----W--g
BIV_vif      pppRfryprWefvrg-----teys---mtAcvRKgklVltYqYai-----W--K
JDV_vif      papQyryprWefvnm-----Dlys-----qtArLqKeiiIitYrYav---W--a
FIVsubC_vif  rlrKaEGikWSfhtr-----DyymgyvkeElvAgssstpdsLrLYiYisNPLWhgK
FIVpuma_vif  klryVEgilWSfhtr-----EwysdmvrElva---gtgpLklYcYvshPIWk-R

CAEV_vif      YKvg-gtWksigv---WFlqaGdYRkVD-----rhFW-----waWRiliCSCr
SRLV_vif      YKva-gtWksigv---WFlqaGdYKkVD-----qhFW-----waWRilmCSCr
OLV_vif      YKsq-ekWniigi---WYdspGeYRDKE-----kqFW-----fhWRiamCSCk
MNV_vif      YKsq-geWktigv---WYespGdYKgkE-----NqFW-----fhWRialCSCn
HIV-2_vif    ltpe-kgWlsshaVrltWYtekf-wtDVTp-----Dcad-----ilihstyfSC-
HIV-1_vif    lhtgerdWhlgggVsieWrkkry-stqVDP-----elad-----qlihlyyfdC-
BIV_vif      -----rvWtietg---Ftdpslf--MtPagthTteEighld-----lfWlry-CSCp
JDV_vif      -----reWkiqtg---fldlgyL---MtPagthTtgELNeld-----lfWvrYtl-Cq
FIVsubC_vif  YRpglknfnkewpfvnmWiktgfmwdDIEkqkIcvGgEISpgWgPGmVgiaiKaFs--Cg
FIVpuma_vif  YRpt-feWnpcwpygnlWltekymWE-IqqddIwTGkvtSqFp-PGYIalivKaYtCkCd

CAEV_vif      KEkfDIREFmrGRhrw---DlCKSCaQgeVVKHTrtkSLerLvLLqmveq-----Hv
SRLV_vif      KERfNIkEFLrGghrw---DlCKSCaQgeIKHTrPrSLerLvLLhiveH-----Hv
OLV_vif      KERwDIRDFmvGKhrw---DlCKSCiQgeIVRHTePrSLQRLALLhivrn-----Hv
MNV_vif      KtrwDIREFmiGKhrw---DlCKSCiQgeIVKnTnPrSLQRLALLhLakD-----Hv
HIV-2_vif    ftagEVRrairGEklL-----SCcnyqahkaqvpSLQyLALvuvqqNdrpqrkgtar
HIV-1_vif    fsdsarKaLlGhivs-----prcEyq-agHnkvgSLQyLALaaLitp-----kk
BIV_vif      hEmpplwDfLrGtlnl--RisCRralQasVltsTPrhSLQRLAAALqLctN-----ac
JDV_vif      hrspkwRElllGEMth---tsCRtaQaaVVsHTkPhtLQRLAGLtlVcn-----qn
FIVsubC_vif  ErkiEatpvmiiReeidpKkwCgdCwnlmcLrnsPPgtLQRLAMLa-cgr-----ka
FIVpuma_vif  KrdltyREiilGkwyL---kwCadCwaliVVRnTPsItLQRLAAALaLgr-----kl

CAEV_vif      FQvlPlWrARrsSttdfPwcrdttgYThaWsvqecwlmeyLlEde----
SRLV_vif      FQvlPlWrARrsStidfPwcrdtsgYThaWsaqecwlmeyLlEde----
OLV_vif      FQimPlWrARrvTvqrfPwsgteglYdtlvytgllghginI-----
MNV_vif      FQvmPlWrARrvTvqkfPwcrspmgYTipWslqecwemesIfE-----
HIV-2_vif    kQWrrdhwrglrvAredhrsLkqggsepsaprahfpgvakVleila---
HIV-1_vif    i-----kpPlpsvtkltedrWnkpgktkghrgshtmngh-
BIV_vif      lcwy-----Plg-rindtTplWlnfssgkeptIqqlsGhp-
JDV_vif      lcwy-----Pvg-tvtrnSplWmhfttkeptIqqlsGhp-
FIVsubC_vif  kcWrgccnqRfvSpyrtpadleviqYkpgWnllwlgel-----
FIVpuma_vif  YsWyckppyRffeArvtPldhrilisSar--qedlykldkgsdnanrsm

```

Fig S3. Alignment of representative lentivirus Vif proteins.



```

OLV_rev          qAyRqvReiRYTRv-----tvvieapVdleE----kqReerdGssg
EIAV-Ireland_rev --maegRdsRYqeemipkeeskgkeekgrnDwWkiapqtpLDndDwccIlrQslPeektP
EIAV-liaoning_rev -----dpqrpLDndEwcrIlrQslPeeKiP
FIVpuma_rev      -----kYsiyvsGiqP
JDV_rev          MmeeGrKeepeeRgekstmrDlIqravdkghltarppvhhVklgrsntVsiaecarGyrP
HIV-2_rev        MSeRadEe-----glqgkLr---llrLlHQtnPypqgP
HIV-1_rev        MAgRsgd-----sdeelIrtvrlIkLlYQsnPppnpe
MVV_rev          MAsKesKpsRtTRr-----gmepplrEtWnqvlqelVkrqqgeeeeqQglvsGlqa
SMLV_rev         -mdagaKhirFTgeetwcevtmgeegk-----kkqegcnkEqqDiqnIkYpkiPtGhsh
CAEV_rev         MvImakvysyYSsriirmhsDk-----scdmcMstscADiqnskYpdiPtGhsh

OLV_rev          sE-----nleheKRtspRsf-iqiW---RatvQawktspwgkgWKK-ilym
EIAV-Ireland_rev sQTCiARRel-----GppqvqstpskRe---RW--LRGqiQqaEslqeqlWRi-rgvq
EIAV-liaoning_rev sQTCiARRhl-----GppgvscvpgRRd---sW--LRGqvQhaEalqeqlWRi-rgvq
FIVpuma_rev      cd-----gq-----snrnkRRnKqRRrrrrRW--rtiMnsleDR-----
JDV_rev          cR-----GrrpaRRppiRRh-psfWgtLRGLvseaQRrqedrmsdlenMa
HIV-2_rev        -----GtasqRRnRrRRr-rrQW--LR-LvalanKlcavpdpptsPld
HIV-1_rev        -----GtrqaRRnRrRRw-reR---qRqIhsisERilgtylgRsaepvp
MVV_rev          sKadqiytgnsgrstGgiggkKkKkgw--yKW--LRkLrareknipsqfy---pdMe
SMLV_rev         l-----GnksrRRRrksgf--wRW--LRGIRRqrntpkdgnk---egLv
CAEV_rev         h-----GnksrRRRrksgf--wRW--LRGIRQqrnKrkdst---esLe

OLV_rev          tLlPlLtlQiwMteetgwngd-----
EIAV-Ireland_rev qsaeaLr-Evn--qgiwkElqwtrrlrgDyss-----
EIAV-liaoning_rev qtakeLE-kvn--keiwrElqytrrrqhGdyGs-----
FIVpuma_rev      -----fE-kLf-----
JDV_rev          eleerfE-DLaLvdsggknpaapaqsvsppssnpfayslshfskskrvdcgekgnrwrp
HIV-2_rev        raIqhLQ-rLti-qelpdpptdlpesnsNqGl-----
HIV-1_rev        lqLppLE-rLTLdcnedcgtsgtqgvgsqil-----
MVV_rev          snMvgmE-nLTLEtqlednalynpathigdma-----
SMLV_rev         ecVgaLa-ELTLdgvmeeEsaeaahstDdGn-----
CAEV_rev         pcLgaLa-ELTLEgamekgpaeaarpsaDdGn-----

OLV_rev          -----
EIAV-Ireland_rev --fysskrEErrWgEesKprilKPGdSKrRRRKhL---
EIAV-liaoning_rev -fgdyrrrEEerWgESs-prvLKPGdSKrRRRKhL---
FIVpuma_rev      -----genRppq---
JDV_rev          gafpgagisEldwiESgdggderPkggRypRggntps
HIV-2_rev        -----aET-----
HIV-1_rev        -----vEsptvLESgtKE-----
MVV_rev          ---mdgrEwmewrESaQKEkrKggLSggRtnaypgk
SMLV_rev         -----ldkwtawrtppQK-----
CAEV_rev         -----ldkwmaWrtppqK-----

```

Fig S4. Alignment of representative lentivirus Rev proteins.
